# Supplementary material
Source: HighWire-hosted journal article supplement (https://cmaj.ca/highwire/filestream/57943/field_highwire_adjunct_files/1/in-koelewijn-2-at.pdf)
Supplement: in-koelewijn-2-at.pdf [file in-koelewijn-2-at.pdf]

**Appendix 2 (as provided by the authors):** Instruments used to evaluate outcomes in the study of the use of nurse-led clinics in cardiovascular risk management.

| <b>Outcome</b>                                    | <b>Instrument</b>                                                                                                                                                                                                          | <b>Analysis</b>                                                                                                                                                                                                                                                         |
|---------------------------------------------------|----------------------------------------------------------------------------------------------------------------------------------------------------------------------------------------------------------------------------|-------------------------------------------------------------------------------------------------------------------------------------------------------------------------------------------------------------------------------------------------------------------------|
| Smoking                                           | 2 items; validated questionnaire <sup>1</sup>                                                                                                                                                                              | Proportion of smoking patients; proportion of patients meeting national recommendation (= no smoking)                                                                                                                                                                   |
| Fat intake                                        | 35 items; validated questionnaire <sup>2</sup>                                                                                                                                                                             | Mean sum score; proportion of patients meeting national recommendation (= dietary fat intake: Saturated fat: males maximum 28 gram and females 22 gram per day.                                                                                                         |
| Fruit and vegetables                              | 8 items; validated questionnaire <sup>3</sup>                                                                                                                                                                              | Mean sum score; proportion of patients meeting national recommendation (= 200 gram fruit or 2 pieces a day; 200 gram vegetables or four serving spoons a day)                                                                                                           |
| Physical activity                                 | Modified Dutch version of the CHAMPS, 15 items; validated questionnaire, Dutch version has not been validated <sup>4,5</sup>                                                                                               | Mean; proportion of patients meeting national recommendation (= physical activity: Accumulate 30 minutes or more of moderate-intensity physical activity (gardening, brisk walking, bicycling, housework, dancing) on at least five, preferable all, days of the week.) |
| Alcohol                                           | Quantity-frequency method; 2 items; validated questionnaire <sup>6</sup>                                                                                                                                                   | Proportion of patients meeting national recommendation (= males: $\leq 3$ alcohol units per day, females: $\leq 2$ alcohol units per day)                                                                                                                               |
| 10-year mortality risk of cardiovascular diseases | Based on patient's sex, age, systolic blood pressure, cholesterol ratio, and smoking behaviour, using SCORE <sup>7</sup> for patients without diabetes, and the UK PDS risk engine <sup>8</sup> for patients with diabetes | Mean; proportion of patients having high risk ( $\geq 10\%$ risk or having diabetes)                                                                                                                                                                                    |

## References

1. Mudde AN. *Meetinstrumenten voor onderzoek naar roken en stoppen met roken [measurements for research about smoking and stop smoking]*. Den Haag: Stivoro, 2000.
2. van Assema P, Brug J, Ronda G, Steenhuis I. The relative validity of a short Dutch questionnaire as a means to categorize adults and adolescents to total and saturated fat intake. *J Hum Nutr Diet* 2001;14(5):377-90.
3. Bogers RP, Van Assema P, Kester AD, Westerterp KR, Dagnelie PC. Reproducibility, validity, and responsiveness to change of a short questionnaire for measuring fruit and vegetable intake. *Am J Epidemiol* 2004;159(9):900-9.
4. Stewart AL, Mills KM, King AC, Haskell WL, Gillis D, Ritter PL. CHAMPS physical activity questionnaire for older adults: outcomes for interventions. *Med Sci Sports Exerc* 2001;33(7):1126-41.
5. Harada ND, Chiu V, King AC, Stewart AL. An evaluation of three self-report physical activity instruments for older adults. *Med Sci Sports Exerc* 2001;33(6):962-70.
6. Lemmens P, Tan ES, Knibbe RA. Measuring quantity and frequency of drinking in a general population survey: a comparison of five indices. *J Stud Alcohol* 1992;53(5):476-86.
7. Conroy RM, Pyorala K, Fitzgerald AP, Sans S, Menotti A, De Backer G, et al. Estimation of ten-year risk of fatal cardiovascular disease in Europe: the SCORE project. *Eur Heart J* 2003;24(11):987-1003.
8. Stevens RJ, Kothari V, Adler AI, Stratton IM. The UKPDS risk engine: a model for the risk of coronary heart disease in Type II diabetes (UKPDS 56). *Clin Sci (Lond)* 2001;101(6):671-9.
